# Supplementary material for: Examples of unwanted variation when characterising dissolved organic matter using direct injection electrospray mass spectrometry and chemometrics
Source: Royal Society of Chemistry journal article supplement (doi:10.1039/c8ay00226f), 2018-01-01
Supplement: c8ay00226f1.pdf [file c8ay00226f1.pdf]

Supporting information: List of samples for set 1 with corresponding IHSS identity and comments.

| Sample set 1<br>ref # | International Humic Substance<br>Society (IHSS) identity | Comments                              |
|-----------------------|----------------------------------------------------------|---------------------------------------|
| S20                   | 1R101F                                                   | SRFA (Suwannee River FA)              |
| S24/S41               | 1R103H                                                   | Pony Lake FA (Antarctica)             |
| S27                   | n/a                                                      | TWL Stream (Alaskan Tundra Stream)    |
| S28                   | n/a                                                      | Eagle River FA (Rocky Mountains)      |
| S29                   | n/a                                                      | Deer Creek FA (Rocky Mountains)       |
| S30                   | n/a                                                      | Arctic Ocean FA (from Oligotuk point) |
| S31                   | n/a                                                      | Ogeechee River HA (Georgia)           |
| S32                   | n/a                                                      | Ogeechee River FA (Georgia)           |
| S33                   | n/a                                                      | Ohio River FA                         |
| S34                   | n/a                                                      | Missouri River FA                     |
| S35                   | n/a                                                      | Williams Lake FA (BC, Canada)         |
| S36                   | n/a                                                      | Coal Creek FA (Colorado)              |
| S37                   | n/a                                                      | F1 FA                                 |
| S38                   | n/a                                                      | Penobscot River FA (Maine)            |
| S39                   | n/a                                                      | Pacific Ocean FA                      |
| S40                   | n/a                                                      | Yukon River FA (Pilot, Alaska)        |
| S42                   | n/a                                                      | EF5 River FA (Rocky Mountain Stream)  |
